# Supplementary material for: Differential Regulation of Proinflammatory Mediators following LPS- and ATP-Induced Activation of Monocytes from Patients with Antiphospholipid Syndrome
Source: Hindawi journal article supplement (doi:10.1155/2015/292851), 2015-01-01
Supplement: f1 [file 292851.f1.pdf]

**Table S1:** Description of investigated genes and used primers.

| <b>Gene abbreviat<br/>ion</b> | <b>Gene name<br/>(synonyms)</b>                              | <b>GenBank<sup>a</sup><br/>Accession<br/>number</b> | <b>Sense, antisense primers</b>                                                | <b>LNA<br/>probe<sub>b</sub></b> |
|-------------------------------|--------------------------------------------------------------|-----------------------------------------------------|--------------------------------------------------------------------------------|----------------------------------|
| RPL32 <sup>c</sup>            | Ribosomal protein L32                                        | NM_000994.3                                         | 5'- gaa gtt cct ggt cca caa cg -3' L<br>5'- gcg atc tcg gca cag taa g -3' R    | #17                              |
| IL-1B <sup>c</sup>            | Interleukin 1, beta                                          | NM_000576.2                                         | 5'- tac ctg tcc tgc gtg ttg aa-3' L<br>5'- tct ttg ggt aat ttt tgg gat ct-3' R | #78                              |
| NLRP3 <sup>c</sup>            | NLR family, pyrin domain containing 3                        | NM_001243133.1                                      | 5'- tgt cct ccc aag ctc ctc t -3' L<br>5'- aag cag cac tca tgc gag a -3' R     | #27                              |
| CCL2 <sup>c</sup>             | Chemokine (C-C motif) ligand 2                               | NM_002982.3                                         | 5'- agt ctc tgc cgc cct tct -3' L<br>5'- gtg act ggg gca ttg att g-3' R        | #40                              |
| TLR2 <sup>d</sup>             | Toll-like receptor 2                                         | NM_003264.3                                         | MW:6364 3202<br>MW:6364 5433                                                   | #14                              |
| IL-6 <sup>d</sup>             | Interleukin 6                                                | NM_000600.3                                         | 80117B3-0314C03 7/85<br>80117B3-0314D03 8/58                                   | #7                               |
| CXCL10 <sup>d</sup>           | Chemokine (C-X-C motif) ligand 10                            | NM_001565.3                                         | 70221B3-07107F07 30/67<br>70221B3-0396B03 14/57                                | #34                              |
| STAT3 <sup>d</sup>            | Signal transducer and activator of transcription 3           | NM_003150.3                                         | 81106B3-0729A07 11/99<br>81106B3-0729B07 9/90                                  | #18                              |
| IL-23A <sup>d</sup>           | Interleukin 23, alpha subunit p19                            | NM_016584.2                                         | 80117B3-0213G02 3/58<br>80117B3-0213H02 4/58                                   | #76                              |
| P2X7 <sup>c</sup>             | Purinergic receptor P2X, ligand-gated ion channel, 7 (P2RX7) | NM_002562.5                                         | Hs00175721_m1                                                                  |                                  |

<sup>a</sup>Gene sequences available online at <http://www.ncbi.nlm.nih.gov/>

<sup>b</sup> Numbers of Locked Nucleic Acid (LNA) probes according to the commercially available library ([www.universalprobelibrary.com](http://www.universalprobelibrary.com))

<sup>c</sup>Primers/probe sets (PrimeTime qPCR Assays) were from Metabion International AG, Germany

<sup>d</sup>Primers/probe sets (PrimeTime qPCR Assays) were from Integrated DNA Technologies, Coralville, Iowa, USA

<sup>e</sup>Primers/probe sets (TaqMan® Gene Expression Assay) were from Life Technologies Corporation, Applied Biosystem Carlsbad, USA
